# The Effect of *pstS* and *phoB* on Quorum Sensing and Swarming Motility in *Pseudomonas aeruginosa*

Inna Blus-Kadosh<sup>1,2</sup>, Anat Zilka<sup>1,2</sup>, Gal Yerushalmi<sup>1,2</sup>, Ehud Banin<sup>1,2\*</sup>

**1** The Institute for Nanotechnology and Advanced Materials, Bar-Ilan University, Ramat Gan, Israel, **2** The Mina and Everard Goodman Faculty of Life Sciences, Bar-Ilan University, Ramat Gan, Israel

## Abstract

*Pseudomonas aeruginosa* is an opportunistic pathogen that can cause a wide range of infections and inflammations in a variety of hosts, such as chronic biofilm associated lung infections in Cystic Fibrosis patients. Phosphate, an essential nutrient, has been recognized as an important signal that affects virulence in *P. aeruginosa*. In the current study we examined the connection between phosphate regulation and surface motility in *P. aeruginosa*. We focused on two important genes, *pstS*, which is involved in phosphate uptake, and *phoB*, a central regulator that responds to phosphate starvation. We found that a mutant lacking *pstS* is constantly starved for phosphate and has a hyper swarming phenotype. Phosphate starvation also induced swarming in the wild type. The *phoB* mutant, on the other hand, did not express phosphate starvation even when phosphate was limited and showed no swarming. A double mutant lacking both genes (*pstS* and *phoB*) showed a similar phenotype to the *phoB* mutant (i.e. no swarming). This highlights the role of *phoB* in controlling swarming motility under phosphate-depleted conditions. Finally, we were able to demonstrate that PhoB controls swarming by up-regulating the Rhl quorum sensing system in *P. aeruginosa*, which resulted in hyper production of rhamnolipids: biosurfactants that are known to induce swarming motility.

**Citation:** Blus-Kadosh I, Zilka A, Yerushalmi G, Banin E (2013) The Effect of *pstS* and *phoB* on Quorum Sensing and Swarming Motility in *Pseudomonas aeruginosa*. PLoS ONE 8(9): e74444. doi:10.1371/journal.pone.0074444

**Editor:** Jens Kreth, University of Oklahoma Health Sciences Center, United States of America

**Received:** June 3, 2013; **Accepted:** August 2, 2013; **Published:** September 4, 2013

**Copyright:** © 2013 Blus-Kadosh et al. This is an open-access article distributed under the terms of the Creative Commons Attribution License, which permits unrestricted use, distribution, and reproduction in any medium, provided the original author and source are credited.

**Funding:** The work was supported by the Israel Science Foundation Grants No. 366/07 and 1124/12 to E.B. The funders had no role in study design, data collection and analysis, decision to publish, or preparation of the manuscript.

**Competing Interests:** The authors have declared that no competing interests exist.

\* E-mail: ehud.banin@biu.ac.il

## Introduction

*Pseudomonas aeruginosa* is a versatile bacterium that can adapt to a variety of niches and grows well in soil, water, plants and animals [1]. *P. aeruginosa* is also an opportunistic pathogen that can cause a variety of infections such as chronic infection of the lungs in Cystic Fibrosis (CF) patients [2], urinary tract infections resulting from catheterization [3], burn wounds [4] and Keratitis [5]. An important aspect of the *P. aeruginosa* “life style” is its ability to switch from a planktonic to a sessile mode of growth, depending on nutrient availability and its surrounding bacterial community. When nutrient availability is scarce, *P. aeruginosa* uses swarming motility, a coordinated movement on a surface, using flagella, biosurfactants [6] and Type-IV pili [7], in order to find an optimal niche [8]. In this mode of growth, planktonic cells differentiate to elongated and hyper-flagellated cells that spread across the surface. In order to facilitate the movement, *P. aeruginosa* secretes rhamnolipids [6], glycolipids that act as a biosurfactant and are produced by the *rhlAB* operon [9]. Rhamnolipid production is regulated by Quorum Sensing (QS) [10–12], a social behavior in which bacteria sense and respond to its surrounding population by producing and receiving signal molecules. There are three known QS systems in *P. aeruginosa* – Las and RhI, each consisting of an auto-inducer molecule from the acyl-homoserine lactone (AHL) family (synthesized by the LasI and RhII enzymes) and a response regulator (LasR and RhIR) [13], and PQS (*Pseudomonas* Quinolone Signal), a secondary metabolite that functions as a QS molecule [14]. In addition to rhamnolipid production, QS in *P. aeruginosa*

affects many bacterial processes, such as virulence [15] and biofilm formation [16]. While searching for irregular swarming phenotypes using a transposon mutant library, we came upon a hyper-swarming mutant. The mutated gene was mapped to *pstS*, a key component in the phosphate specific transport system (Pst) [17]. Phosphate is an essential nutrient, used in the assembly of ATP, LPS, nucleic acids and other cell components. *P. aeruginosa* has two phosphate uptake systems – Pit, a low-affinity, constitutively operating channel [18], and Pst – a high-affinity ABC transporter. The Pst system is encoded by the *pst* operon, containing the genes *pstA*, *pstB*, *pstC*, *pstS* and *phoU*. *pstA*, *pstB* and *pstC* encode the transporter proteins, while *pstS* encodes a periplasmic phosphate-binding protein that transfers the phosphate to the bacterial cytoplasm through the transporter. The system is regulated by PhoB/R – a two-component system activated by phosphate depletion [19]. When phosphate levels in the bacteria become low, PhoR phosphorylates PhoB, which in turn acts as a transcription factor and activates genes that have the consensus sequence ‘Pho Box’ in their promoters, such as the *pst* operon. In recent years, studies concerning the Pst system have uncovered a connection between phosphate depletion and virulence – over-expression of *PstS* has been found in ampicillin-resistant *Streptococcus pneumoniae* [20], a possible correlation between phosphate depletion and *P. aeruginosa* in a gut mouse model has also been suggested [21], and it has been shown that deletion of PhoB affects swarming [22]. Furthermore, the Pst system has been connected to virulence in many bacteria [23]. For example, in clinical strains of *P. aeruginosa*,

*PstS* forms extracellular appendages that increase the strain's virulence in a mouse model [24]. In this study, we establish the intricate connection between swarming, QS and phosphate availability in order to better understand the molecular mechanisms that regulate surface motility in *P. aeruginosa*. We show that in the absence of phosphate, PhoB up-regulates *rhlR* expression, which results in rhamnolipid production that promotes hyper swarming.

## Materials and Methods

### Bacterial Strains, Plasmids, and Media

The bacterial strains and plasmids used in this study are shown in Table 1. For Alkaline Phosphatase and Real-time assays, strains were grown on M9 minimal medium (20 mM NH<sub>4</sub>Cl; 12 mM Na<sub>2</sub>HPO<sub>4</sub>; 22 mM KH<sub>2</sub>PO<sub>4</sub>; 8.6 mM NaCl; 1 mM MgSO<sub>4</sub>; 1 mM CaCl<sub>2</sub>; 11 mM Dextrose) supplemented with 50 μM FeCl<sub>3</sub>. For swarming assays, we used M9 minimal medium or M9 depleted of phosphate (20 mM NH<sub>4</sub>Cl; 8.6 mM NaCl; 1 mM MgSO<sub>4</sub>; 1 mM CaCl<sub>2</sub>; 11 mM Dextrose), both supplemented with 0.5% Casamino acids, 50 μM FeCl<sub>3</sub> and solidified with 0.5% Bacto Agar (Difco). For deletions, Luria-Bertani broth (LB, Difco), No Salt LB (NSLB, 0.5% Tryptone, 0.5% yeast extract), Vogel Bonner Minimal Medium (VBMM) and *Pseudomonas* Isolation Agar (PIA, Difco) were used. All strains were grown at 37°C with shaking, unless specified otherwise. Antibiotic concentrations used in this study were 300 μg/ml or 150 μg/ml carbenicillin for *P. aeruginosa*, 100 μg/ml ampicillin for *E. coli*, 100 μg/ml gentamicin for *P. aeruginosa* and 20 μg/ml for *E. coli*.

### Construction of Strains and Plasmids

Deletion mutants of *pstS*, *phoB*, *pstS+phoB*, *rhlA* and *rhlR* were constructed as previously described [25]. Overlap extension PCR using the primers specified in Table S1 was used in order to generate a fragment containing the upstream and downstream regions of each gene. Each fragment was cloned into the allelic exchange vector DB3.1 pEX18GmGW [26] using BP-Clonase (Invitrogen). Each deletion was introduced to PAO1 or Δ*pstS* using bi-parental mating [27]. Deletions were generated using a standard method for two-step allelic exchange as described by Schweizer and Hoang [28] and were confirmed by PCR.

### Swarming Motility Assay

Strains were grown overnight in M9 medium supplemented with Casamino acids, FeCl<sub>3</sub>, and carbenicillin if necessary. Afterwards, the bacteria were diluted 1:10 into fresh medium and grown for an additional three hours in order to reach the logarithmic growth phase. 2.5 μl from each culture was plated in the middle of a swarming plate, which contained M9 medium or M9 depleted of phosphate, supplemented with 0.5% Casamino acids, 50 μM FeCl<sub>3</sub> and carbenicillin if necessary, and solidified with 0.5% Bacto Agar. Plates were incubated at 37°C for 24 hours.

### Alkaline Phosphatase Assay

Alkaline Phosphatase (AP) is a protein whose expression is enhanced under phosphate starvation [29]. We utilized AP activity in order to assay a strain's phosphate starvation levels. AP activity was measured by sampling strains grown in a liquid culture or on

**Table 1.** Strains used in this study.

| Strain or plasmid                   | Description                                                                                                                                                                                                       | Source or reference              |
|-------------------------------------|-------------------------------------------------------------------------------------------------------------------------------------------------------------------------------------------------------------------|----------------------------------|
| <b><i>P. aeruginosa</i> strains</b> |                                                                                                                                                                                                                   |                                  |
| PAO1                                | Wild type                                                                                                                                                                                                         | [36]                             |
| Δ <i>pstS</i>                       | PAO1 with an unmarked deletion of <i>pstS</i>                                                                                                                                                                     | This study                       |
| Δ <i>phoB</i>                       | PAO1 with an unmarked deletion of <i>phoB</i>                                                                                                                                                                     | This study                       |
| Δ <i>pstS</i> Δ <i>phoB</i>         | PAO1 with an unmarked deletion of <i>pstS</i> and <i>phoB</i>                                                                                                                                                     | This study                       |
| Δ <i>rhlA</i>                       | PAO1 with an unmarked deletion of <i>rhlA</i>                                                                                                                                                                     | This study                       |
| Δ <i>rhlR</i>                       | PAO1 with an unmarked deletion of <i>rhlR</i>                                                                                                                                                                     | This study                       |
| Δ <i>pstS</i> Δ <i>rhlA</i>         | PAO1 with an unmarked deletion of <i>pstS</i> and <i>rhlA</i>                                                                                                                                                     | This study                       |
| Δ <i>pstS</i> Δ <i>rhlR</i>         | PAO1 with an unmarked deletion of <i>pstS</i> and <i>rhlR</i>                                                                                                                                                     | This study                       |
| <b><i>E. coli</i> strains</b>       |                                                                                                                                                                                                                   |                                  |
| DH5α                                | F'/endA1 hsdR17 supE44 thi-1 recA1 gyrA relA1 Δ(lacZYA-argF) U169 deoR (Φ80 dlacZ-M15 recA1)                                                                                                                      | [37]                             |
| S17.1 (λ.pir)                       | <i>recA</i> derivative of <i>E. coli</i> 294 (F- <i>thi pro hsdR</i> ) carrying a modified derivative of IncPα plasmid pRP4 (Aps Tcs Kms) integrated in the chromosome, Tpr; lysogenized with bacteriophage λ.pir | Y. Irie and M. R. Parsek         |
| <b>Plasmids</b>                     |                                                                                                                                                                                                                   |                                  |
| pUCP18Ap                            | A broad-host range cloning vector. Cbr/AmpR                                                                                                                                                                       | [38]                             |
| DB3.1 pEX18GmGW                     | pEX18Gm containing the Gateway (GW) destination cloning site. GmR                                                                                                                                                 | Nan Fulcher and Matthew Wolfgang |
| <i>pphoB</i>                        | pUCP18Ap containing the <i>phoB</i> gene for complementation                                                                                                                                                      | This study                       |
| <i>ppstS</i>                        | pUCP18Ap containing the <i>pstS</i> gene for complementation                                                                                                                                                      | This study                       |
| <i>prhlA</i>                        | pUCP18Ap containing the <i>rhlA</i> gene for complementation                                                                                                                                                      | This study                       |
| <i>prhlR</i>                        | pUCP18Ap containing the <i>rhlR</i> gene for complementation                                                                                                                                                      | This study                       |
| pECP61.5                            | Contains a <i>rhlA-lacZ</i> fusion, used for C4-HSL detection                                                                                                                                                     | [11]                             |

AmpR -Ampicillin resistance for *E. coli* Cbr – Carbenicillin resistance for *P. aeruginosa*. GmR – Gentamicin resistance.  
doi:10.1371/journal.pone.0074444.t001

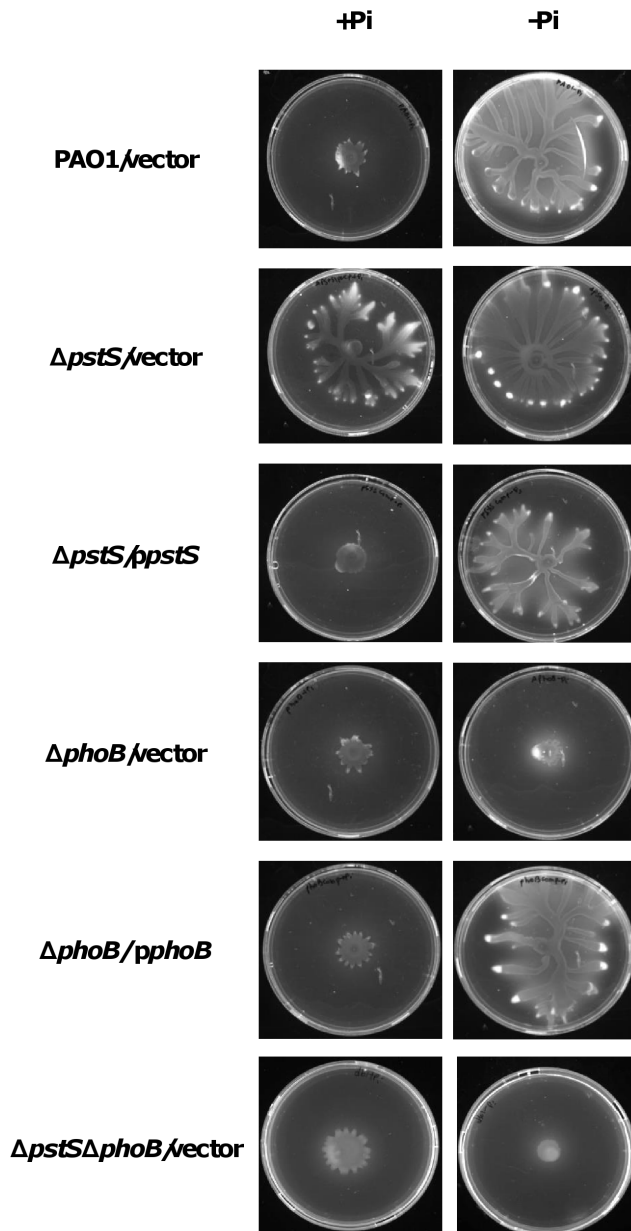

**Figure 1. Influence of *pstS* and *phoB* deletion on swarming motility.** PAO1,  $\Delta pstS$ ,  $\Delta phoB$  and  $\Delta pstS\Delta phoB$  carrying an empty vector (pUCP18Ap) or a complementation plasmid (*ppstS* and *pphoB*) were grown for 24 hours at 37°C on swarming plates containing M9 (20 mM) or phosphate-depleted M9 (0.2 mM) as described in Materials and Methods.

doi:10.1371/journal.pone.0074444.g001

swarming plates. To measure AP from a liquid culture, strains were grown overnight in M9 medium supplemented with FeCl<sub>3</sub>, and carbenicillin if necessary. Afterwards, bacteria were diluted to an O.D<sub>595nm</sub> of 0.04 into 50 ml of fresh M9 medium, containing 50 μM FeCl<sub>3</sub> and grown for an additional 10 hours. Then, 6 ml from each strain were taken and centrifuged for 10 minutes at 2,200 g (Centrifuge 5418; eppendorf). The pellet was re-suspended with 20 μl of Chloroform. After 15 minutes of incubation at room temperature, 20 μl of 0.01 M Tris-HCl (pH=8) were added to each sample, and the samples were centrifuged for 20 minutes at 6,000 g. Following centrifugation,

30 μl from each sample's supernatant were added to a 96-well plate, containing the reaction buffer (5 μl of 0.5 mM MgCl<sub>2</sub> and 10 μl of 1 M Tris (pH=9.5)). 5 μl of 500 mM p-Nitrophenyl Phosphate (PNPP, NEB) were added to each well and the reaction was read at 405 nm in an ELISA plate reader (Synergy™ 2 Multi-Detection Microplate Reader; Biotech). Results were normalized to each samples' total protein concentration using Bradford assay (Thermo).

When measuring AP activity from swarming plates, bacteria grown for 24 hours on swarming plates were scraped off and suspended in 2 ml of M9, then submitted to the same procedure as the samples taken from liquid culture.

#### RNA Extraction, RT-PCR and Real-Time PCR Analysis

Strains were grown overnight in M9 medium supplemented with FeCl<sub>3</sub>. Then, bacteria were diluted to an O.D<sub>595nm</sub> of 0.04 into 50 ml of fresh M9 medium, containing FeCl<sub>3</sub> and grown for an additional 48 hours. Afterwards, 2 ml from each culture was incubated with 4 ml of RNeasy Protect Bacteria Reagent (Qiagen). RNA extraction was performed using RNeasy Mini Kit (Qiagen). cDNA was synthesized from 500 ng of RNA using GoScript™ Reverse Transcription System (Promega). Real-time PCR was performed using CFX-96 Touch Real-Time PCR detection system (Bio-Rad). Results were normalized to the expression of PA1769 [30].

#### C4-HSL Quantification

The level of C4-HSL was measured using a bio-reporter strain as previously reported [31]. Briefly, strains were grown overnight in M9 medium supplemented with FeCl<sub>3</sub>. Then, bacteria were diluted to an O.D<sub>595nm</sub> of 0.04 into 50 ml of fresh M9 medium, supplemented with FeCl<sub>3</sub> and grown for an additional 48 hours. Afterwards, 5 ml from each culture was extracted twice with an equal volume of ethyl acetate containing 0.1% glacial acetic acid, as previously described [32]. Ethyl acetate was evaporated using nitrogen gas. Overnight culture of DH5α harboring pECP61.5 was diluted into an O.D<sub>595nm</sub> of 0.1 into modified A medium [33] with ampicillin and 1 mM IPTG. 500 μl of the diluted bacteria was added to each sample and grown at 30°C for 5.5 hours. Cells were then lysed with chloroform and the β-galactosidase activity was measured using Tropix-Galacton kit according to the manufacturer guidelines (Applied Biosystems).

#### Statistical Analysis

Statistical analysis was carried out using unpaired t-test and Turkey's Post Hoc test. P<0.05 was considered as significant.

## Results and Discussion

### Phosphate Starvation Promotes *phoB*-mediated Hyper Swarming

While scanning a transposon mutant library for irregular swarming phenotypes, we found that transposon insertion in the *pstS* gene promoted hyper-swarming. In order to ensure that the phenotype is indeed caused by the disruption of the gene, we generated a clean deletion of *pstS* in PAO1. The mutant showed a hyper-swarming phenotype both in standard M9 minimal medium representing phosphate-repleted conditions (20 mM Pi) and in M9 medium with phosphate depleted conditions (0.2 mM Pi). The wild type, on the other hand, showed swarming ability only under phosphate-depleted conditions (Fig. 1). Complementation of the  $\Delta pstS$  strain with a plasmid encoding *pstS* restored the wild type phenotype.

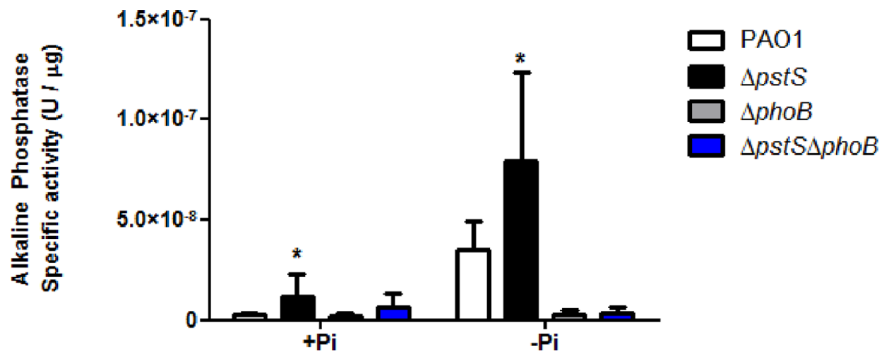

**Figure 2. The effect of *pstS* and *phoB* deletion on phosphate starvation in *P. aeruginosa*.** PAO1,  $\Delta pstS$ ,  $\Delta phoB$  and  $\Delta pstS\Delta phoB$  were grown for 24 hours at 37°C on swarming plates containing M9 or phosphate-depleted M9. After 24 hours, bacteria were scraped off the plates and Alkaline Phosphatase activity was measured using p-Nitrophenyl Phosphate as described in Materials and Methods. Results were normalized to each samples' total protein concentration using Bradford assay. Results shown represent mean+standard deviation of six different experiments. Each experiment was performed in triplicate. Asterisks represent the significant rise in AP activity compared to the WT ( $p < 0.05$ , student's t-test). doi:10.1371/journal.pone.0074444.g002

Next, we generated a clean deletion of *phoB* in PAO1, in order to see how deletion of a protein with a regulatory function in the phosphate uptake system affects the bacteria's swarming pattern. We saw that deletion of *phoB* caused the bacteria to lose all swarming ability, even under phosphate depleted conditions. A similar result was demonstrated previously by Bains *et al.* [22], who showed that a *phoB* mutant loses its ability to swarm when grown on a BM2 medium with low (0.2 mM) phosphate concentration. Complementation of our  $\Delta phoB$  strain with a plasmid encoding *phoB* restored the wild type phenotype (Fig. 1). We then wanted to see which one of the two genes – *pstS* or *phoB* – is responsible for controlling the swarming phenotype under phosphate depleted conditions. To do so, we generated a double mutant, lacking both *pstS* and *phoB* in PAO1. We assumed that if PstS controlled swarming in the presence or lack of phosphate, the double mutant would show the hyper-swarming phenotype presented by the *pstS* mutant, and if PhoB controlled swarming under the tested conditions, the double mutant would act like the *phoB* mutant and show a non-swarming phenotype. Plating the double mutant on swarming plates containing M9 or M9 with low levels of phosphate, generated a non-swarming phenotype under both

conditions (Fig. 1), which led us to conclude that PhoB is responsible for controlling *P. aeruginosa*'s swarming patterns in the presence or lack of phosphate. When we complemented the double mutant with a plasmid containing the *pstS* gene, we received the phenotype presented by *phoB*, and when we complemented the double mutant with a plasmid containing the *phoB* gene (*pphoB*), we received the phenotype presented by *pstS* (Fig.S1A). From these experiments we can conclude that while both *pstS* and *phoB* have impact on swarming motility on media containing low levels of phosphate, PhoB is the protein that regulates swarming under the specified conditions.

### The *pstS* Mutant is Constantly Starved for Phosphate, while the *phoB* Mutant cannot sense the Bacteria's Phosphate Levels

The results from the swarming experiments led us to hypothesize that deletion of *pstS* causes *P. aeruginosa* to be constantly starved for phosphate, whereas deletion of *phoB* causes the bacteria to lose its ability to sense its intra-cellular phosphate levels. Because PhoB is activated under low phosphate levels, we assumed that deletion of *phoB* causes the bacteria to act as if they

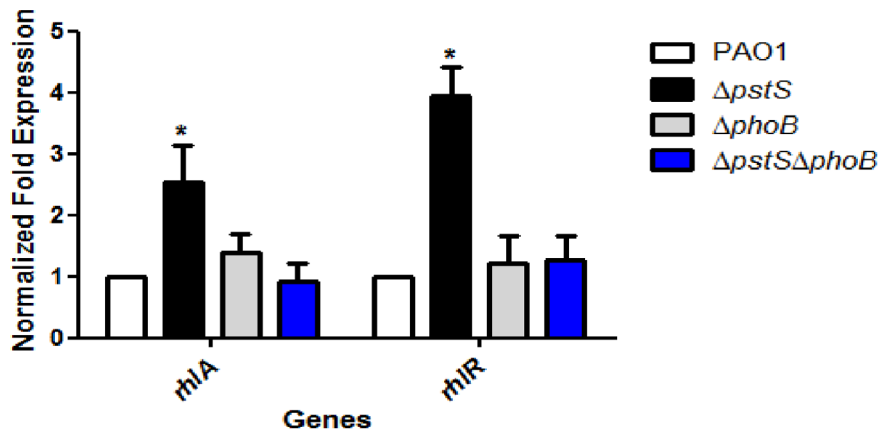

**Figure 3. *pstS* knockout results in elevated *rhIA* and *rhIR* expression.** PAO1,  $\Delta pstS$ ,  $\Delta phoB$  and  $\Delta pstS\Delta phoB$  were grown for 48 hours at 37°C with shaking in M9 medium. Levels of *rhIA* and *rhIR* were measured by Real-Time PCR as described in Materials and Methods. Values were normalized to the expression of PA1769. The results shown are relative to PAO1 and represent mean+standard deviation of nine different experiments. Each experiment was performed in triplicate. Asterisks represent the significant elevation in *rhIA* and *rhIR* transcription compared to the WT ( $p < 0.05$ , student's t-test). doi:10.1371/journal.pone.0074444.g003

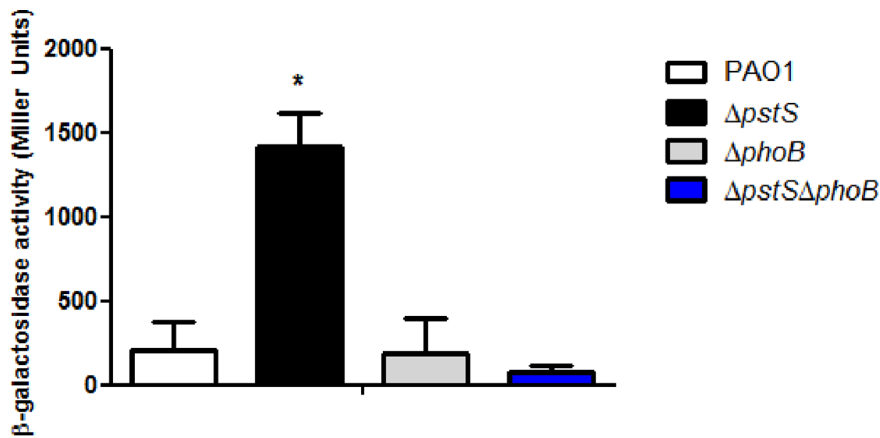

**Figure 4. Phosphate starvation promotes C4-HSL production.** PAO1,  $\Delta pstS$ ,  $\Delta phoB$  and  $\Delta pst\Delta phoB$  were grown for 48 hours at 37°C with shaking in M9 medium. C4-HSL in each strain was extracted and measured as described in Materials and Methods.  $\beta$ -galactosidase activity (Miller Units) represent C4-HSL levels. Results represent mean+standard deviation of three different experiments. Each experiment was performed in triplicate. Asterisks represent the significant elevation in C4-HSL production in  $\Delta pstS$  as opposed to all other strains ( $p < 0.05$ , Turkey's post hoc test). doi:10.1371/journal.pone.0074444.g004

were in a constant state of phosphate saturation. To test this hypothesis, we plated PAO1,  $\Delta pstS$ ,  $\Delta phoB$  and  $\Delta pst\Delta phoB$  on either phosphate depleted or repleted swarming plates in order to measure the Alkaline Phosphatase (AP) activity in each strain, as described in Materials and Methods. AP levels increase when

intra-cellular phosphate levels are low, thus, AP levels point to the degree of phosphate starvation in bacteria. PAO1 was used as a reference – as expected, when grown on standard M9 plates, AP levels were low, and when grown on phosphate-depleted M9, AP levels increased dramatically ( $p < 0.05$ ) (Fig. 2). AP levels in the  $pstS$  mutant were higher than in PAO1 in both media ( $p < 0.05$ ), and AP levels in  $\Delta phoB$  and  $\Delta pst\Delta phoB$  were similar to those of PAO1 grown on standard M9 plates, but did not increase under phosphate depleted conditions (Fig 2). Complementation of the deletion strains, with plasmids encoding  $pstS$  or  $phoB$ , reverted the phenotypes (Fig. S1B). The results suggest that absence of both  $pstS$  and  $phoB$  disrupts *P. aeruginosa*'s ability to respond to its intra-cellular phosphate levels, but in different ways. Deletion of  $pstS$ , the gene that encodes the phosphate-carrying protein, causes the bacteria to lose its ability to acquire phosphate through the Pst system, which puts the bacteria in a state of constant phosphate starvation. On the other hand, deletion of  $phoB$  causes *P. aeruginosa* to lose the regulatory part of the phosphate uptake system. Since PhoB/R are activated only when phosphate levels are low, bacteria with a  $phoB$  deletion will lose their ability to sense when there is a decrease in intra-cellular phosphate levels and therefore will always have a false sense of being in a phosphate saturated environment, hence the lack of swarming and the low AP levels in  $\Delta phoB$  and  $\Delta pst\Delta phoB$  grown in media containing low levels of phosphate.

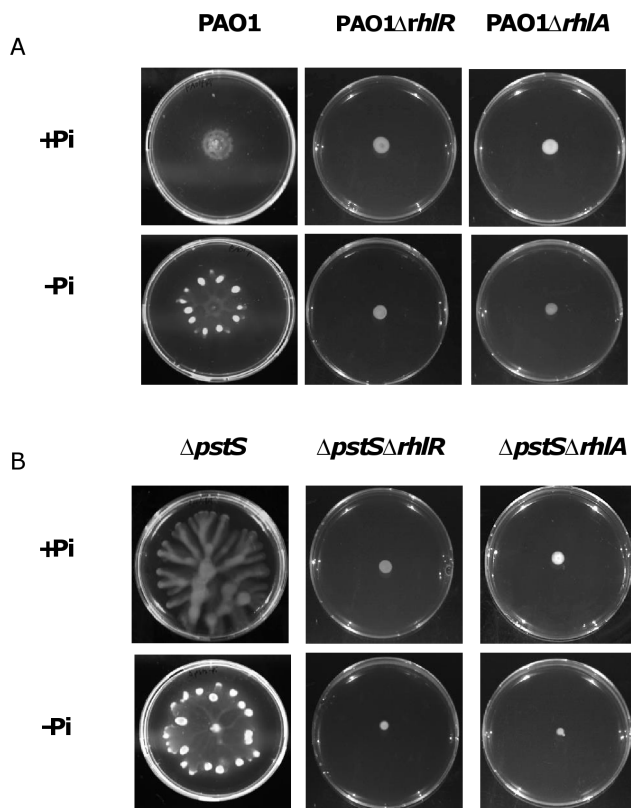

**Figure 5. *rhIA* and *rhIR* deletion cause loss of swarming motility.** A. PAO1, PAO1 $\Delta rhIA$  and PAO1 $\Delta rhIR$  were grown for 24 hours at 37°C on swarming plates containing M9 or phosphate-depleted M9. B.  $\Delta pstS$ ,  $\Delta pstS\Delta rhIA$  and  $\Delta pstS\Delta rhIR$  were grown for 24 hours at 37°C on swarming plates containing M9 or phosphate-depleted M9. doi:10.1371/journal.pone.0074444.g005

#### *rhIR* and *rhIA* are Essential for Swarming Under Phosphate-deplete Conditions

After determining how deletion of  $pstS$  and  $phoB$  affects *P. aeruginosa*'s ability to sense phosphate, we were interested to study the molecular pathway that leads from the bacteria's reaction to phosphate depletion to swarming motility. It was previously shown that the *rhIR* promoter contains a Pho Box, that *rhIR* transcription can be activated under phosphate-limiting conditions [34] and that RhlR controls rhamnolipid production [10]. Therefore, we wanted to see if up-regulation of *rhIR*, and in turn, up-regulation of *rhIA* and increase in rhamnolipid production, is the cause for hyper-swarming under phosphate-depleted conditions. In order to do so, we measured the transcription levels of *rhIR* and *rhIA* in PAO1,  $\Delta pstS$ ,  $\Delta phoB$  and  $\Delta pst\Delta phoB$  grown in M9 medium, using Real-Time PCR. Results were normalized to those of PAO1, the

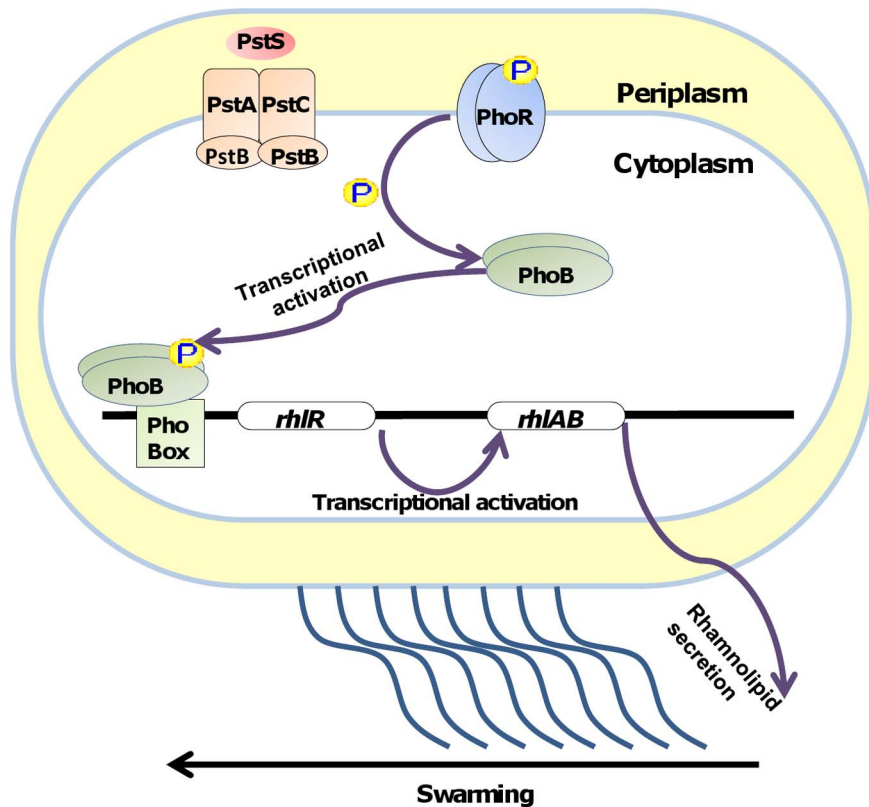

**Figure 6. Model of the regulatory pathway leading to swarming under phosphate depletion.**  
doi:10.1371/journal.pone.0074444.g006

reference strain (Fig. 3). Only in  $\Delta pstS$  did we see a significant rise in transcription levels of *rhoA* and *rhoR* (2.5 and 3.9 fold elevation in gene transcription as opposed to the WT, respectively,  $p < 0.05$ ). Because  $\Delta pstS$  remains constantly starved for phosphate, PhoB is activated in this strain, which strengthens our hypothesis that PhoB is indeed responsible for setting in motion the cascade that ultimately results in swarming in the absence of phosphate. This result is further supported by microarray studies done by Bains et al., showing that *rhoA* and *rhoR* transcription increases under minimal phosphate conditions in *P. aeruginosa* [22]. To further corroborate this data, we measured the C4-HSL levels in each of the strains (Fig. 4). Coinciding with the RT-PCR results, C4-HSL levels in  $\Delta pstS$  were significantly higher than those of the other strains ( $p < 0.05$ ), which shows that the response to phosphate starvation involves all factors of the Rhl system.

Next, in order to further prove that *rhoR* and *rhoA* are responsible for hyper-swarming when phosphate level is low, we generated clean deletions of *rhoR* and *rhoA* in PAO1 and in  $\Delta pstS$ , and plated them on swarming plates containing M9 with either low or high levels of phosphate. The results (Fig. 5) clearly show that deletion of each of these genes abolished the swarming completely in both strains and in both media, which proves that these genes are crucial for *phoB*-mediated swarming when phosphate is low. Complementation of *rhoA* and *rhoR* restored the phenotypes of both PAO1 and  $\Delta pstS$  (data not shown).

All of these results combined piece together the molecular mechanism that is initiated under phosphate-deplete conditions

(Fig. 6) - PhoB is activated upon phosphorylation by PhoR, acts as a transcription factor and binds to promoters containing a Pho Box motif. One of these promoters is the promoter for *rhoR*. *RhoR* undergoes activation, and activates transcription of the *rhoIAB* operon, causing rhamnolipid production, which results in swarming. Interestingly, we have previously shown in *P. aeruginosa* that iron depletion can also cause increased motility by QS-mediated rhamnolipid production [35]. The current study further links between environmental cues and QS, and sheds light on the complicated regulatory network in *P. aeruginosa* that makes this pathogen so versatile and highly adjustable to a variety of niches.

## Supporting Information

**Figure S1 Complementation of *pstS* and *phoB* restores the wild type swarming phenotype.**

(TIF)

**Table S1** Primers used in this study.

(DOCX)

## Author Contributions

Conceived and designed the experiments: IBK GY EB. Performed the experiments: IBK AZ. Analyzed the data: IBK AZ GY EB. Wrote the paper: IBN GY EB.

## References

1. tover CK, Pham XQ, Erwin AL, Mizoguchi SD, Warren P, et al. (2000) Complete genome sequence of *Pseudomonas aeruginosa* PAO1, an opportunistic pathogen. *Nature* 406: 959–964.
2. Kirov SM, Webb JS, O'May C Y, Reid DW, Woo JK, et al. (2007) Biofilm differentiation and dispersal in mucoid *Pseudomonas aeruginosa* isolates from patients with cystic fibrosis. *Microbiology* 153: 3264–3274.
3. Mittal R, Aggarwal S, Sharma S, Chhibber S, Harjai K (2009) Urinary tract infections caused by *Pseudomonas aeruginosa*: a minireview. *J Infect Public Health* 2: 101–111.
4. Church D, Elsayed S, Reid O, Winston B, Lindsay R (2006) Burn wound infections. *Clin Microbiol Rev* 19: 403–434.
5. Hazlett LD (2004) Corneal response to *Pseudomonas aeruginosa* infection. *Prog Retin Eye Res* 23: 1–30.
6. Caiazza NC, Shanks RM, O'Toole GA (2005) Rhamnolipids modulate swarming motility patterns of *Pseudomonas aeruginosa*. *J Bacteriol* 187: 7351–7361.
7. Kohler T, Curty LK, Barja F, van Delden C, Pechere JC (2000) Swarming of *Pseudomonas aeruginosa* is dependent on cell-to-cell signaling and requires flagella and pili. *J Bacteriol* 182: 5990–5996.
8. Verstraeten N, Braeken K, Debkumari B, Fauvart M, Franssaer J, et al. (2008) Living on a surface: swarming and biofilm formation. *Trends Microbiol* 16: 496–506.
9. Deziel E, Lepine F, Milot S, Villemur R (2003) *rhlA* is required for the production of a novel biosurfactant promoting swarming motility in *Pseudomonas aeruginosa*: 3-(3-hydroxyalkanoxy)alkanoic acids (HAAs), the precursors of rhamnolipids. *Microbiology-Sgm* 149: 2005–2013.
10. Daniels R, Vanderleyden J, Michiels J (2004) Quorum sensing and swarming migration in bacteria. *FEMS Microbiol Rev* 28: 261–289.
11. Pearson JP, Pesci EC, Iglewski BH (1997) Roles of *Pseudomonas aeruginosa las* and *rhl* quorum-sensing systems in control of elastase and rhamnolipid biosynthesis genes. *J Bacteriol* 179: 5756–5767.
12. Soberon-Chavez G, Lepine F, Deziel E (2005) Production of rhamnolipids by *Pseudomonas aeruginosa*. *Appl Microbiol Biotechnol* 68: 718–725.
13. Venturi V (2006) Regulation of quorum sensing in *Pseudomonas*. *FEMS Microbiol Rev* 30: 274–291.
14. Pesci EC, Milbank JB, Pearson JP, McKnight S, Kende AS, et al. (1999) Quinolone signaling in the cell-to-cell communication system of *Pseudomonas aeruginosa*. *Proc Natl Acad Sci U S A* 96: 11229–11234.
15. Antunes LC, Ferreira RB, Buckner MM, Finlay BB (2010) Quorum sensing in bacterial virulence. *Microbiology* 156: 2271–2282.
16. de Kievit TR (2009) Quorum sensing in *Pseudomonas aeruginosa* biofilms. *Environmental Microbiology* 11: 279–288.
17. Madhusudhan KT, McLaughlin R, Komori N, Matsumoto H (2003) Identification of a major protein upon phosphate starvation of *Pseudomonas aeruginosa* PAO1. *Journal of Basic Microbiology* 43: 36–46.
18. Rosenberg H, Gerdes RG, Chegwidzen K (1977) Two systems for the uptake of phosphate in *Escherichia coli*. *J Bacteriol* 131: 505–511.
19. Hsieh YJ, Wanner BL (2010) Global regulation by the seven-component Pi signaling system. *Current Opinion in Microbiology* 13: 198–203.
20. Soualhine H, Brochu V, Menard F, Papadopoulou B, Weiss K, et al. (2005) A proteomic analysis of penicillin resistance in *Streptococcus pneumoniae* reveals a novel role for PstS, a subunit of the phosphate ABC transporter. *Molecular Microbiology* 58: 1430–1440.
21. Long J, Zaborina O, Holbrook C, Zaborin A, Alverdy J (2008) Depletion of intestinal phosphate after operative injury activates the virulence of *P. aeruginosa* causing lethal gut-derived sepsis. *Surgery* 144: 189–197.
22. Bains M, Fernandez L, Hancock RE (2012) Phosphate starvation promotes swarming motility and cytotoxicity of *Pseudomonas aeruginosa*. *Appl Environ Microbiol* 78: 6762–6768.
23. Lamarche MG, Wanner BL, Crepin S, Harel J (2008) The phosphate regulon and bacterial virulence: a regulatory network connecting phosphate homeostasis and pathogenesis. *FEMS Microbiol Rev* 32: 461–473.
24. Zaborina O, Holbrook C, Chen Y, Long J, Zaborin A, et al. (2008) Structure-function aspects of PstS in multi-drug-resistant *Pseudomonas aeruginosa*. *PLoS Pathog* 4: e43.
25. Rybtke MT, Borlee BR, Murakami K, Irie Y, Hentzer M, et al. (2012) Fluorescence-based reporter for gauging cyclic di-GMP levels in *Pseudomonas aeruginosa*. *Appl Environ Microbiol* 78: 5060–5069.
26. Choi KH, Schweizer HP (2005) An improved method for rapid generation of unmarked *Pseudomonas aeruginosa* deletion mutants. *BMC Microbiol* 5: 30.
27. Lewenza S, Falsafi RK, Winsor G, Gooderham WJ, McPhee JB, et al. (2005) Construction of a mini-Tn5-luxCDABE mutant library in *Pseudomonas aeruginosa* PAO1: a tool for identifying differentially regulated genes. *Genome Res* 15: 583–589.
28. Schweizer HP, Hoang TT (1995) An improved system for gene replacement and *xylE* fusion analysis in *Pseudomonas aeruginosa*. *Gene* 158: 15–22.
29. Hou CI, Gronlund AF, Campbell JJ (1996) Influence of phosphate starvation on cultures of *Pseudomonas aeruginosa*. *J Bacteriol* 92: 851–855.
30. Son MS, Matthews WJ, Jr, Kang Y, Nguyen DT, Hoang TT (2007) In vivo evidence of *Pseudomonas aeruginosa* nutrient acquisition and pathogenesis in the lungs of cystic fibrosis patients. *Infect Immun* 75: 5313–5324.
31. Parsek MR, Singh PK (2003) Bacterial biofilms: an emerging link to disease pathogenesis. *Annu Rev Microbiol* 57: 677–701.
32. Pearson JP, Passador L, Iglewski BH, Greenberg EP (1995) A second N-acetylhomoserine lactone signal produced by *Pseudomonas aeruginosa*. *Proc Natl Acad Sci U S A* 92: 1490–1494.
33. Pearson JP, Gray KM, Passador L, Tucker KD, Eberhard A, et al. (1994) Structure of the autoinducer required for expression of *Pseudomonas aeruginosa* virulence genes. *Proc Natl Acad Sci U S A* 91: 197–201.
34. Jensen V, Lons D, Zaoui C, Bredenbruch F, Meissner A, et al. (2006) RhlR expression in *Pseudomonas aeruginosa* is modulated by the *Pseudomonas* quinolone signal via PhoB-dependent and -independent pathways. *J Bacteriol* 188: 8601–8606.
35. Glick R, Gilmour C, Tremblay J, Satanower S, Avidan O, et al. (2010) Increase in rhamnolipid synthesis under iron-limiting conditions influences surface motility and biofilm formation in *Pseudomonas aeruginosa*. *J Bacteriol* 192: 2973–2980.
36. Holloway BW, Krishnapillai V, Morgan AF (1979) Chromosomal genetics of *Pseudomonas*. *Microbiol Rev* 43: 73–102.
37. Woodcock DM, Crowther PJ, Doherty J, Jefferson S, DeCruz E, et al. (1989) Quantitative evaluation of *Escherichia coli* host strains for tolerance to cytosine methylation in plasmid and phage recombinants. *Nucleic Acids Res* 17: 3469–3478.
38. Schweizer HP (1991) *Escherichia-Pseudomonas* shuttle vectors derived from pUC18/19. *Gene* 97: 109–121.
